# Supplementary material
Source: ML conference proceedings conference paper supplement (https://openaccess.thecvf.com/content/CVPR2025/html/Peng_Parameter-efficient_Fine-tuning_in_CVPR_2025_paper.html)
Supplement: Supplementary file 1 [file Peng_Parameter-efficient_Fine-tuning_in_CVPR_2025_supplemental.pdf]

# Parameter-efficient Fine-tuning in Hyperspherical Space for Open-vocabulary Semantic Segmentation

## -Supplementary Material-

Zelin Peng<sup>1</sup>, Zhengqin Xu<sup>1</sup>, Zhilin Zeng<sup>1</sup>, Yu Huang<sup>1</sup>, Yaoming Wang<sup>2</sup>, and Wei Shen<sup>1(✉)</sup>

<sup>1</sup>MoE Key Lab of Artificial Intelligence, AI Institute, Shanghai Jiao Tong University

<sup>2</sup>Meituan

{zelin.peng, fate311, bernardeschi, yellowfish, wei.shen}@sjtu.edu.cn

This supplementary material is organized into three main sections. First, we present a detailed derivation of the definition introduced in the main paper (Sec. A). Second, we provide additional qualitative results to further demonstrate the contributions of our H-CLIP (Sec. B). Finally, we provide detailed descriptions of the open-vocabulary segmentation datasets in Section C.

### A. Derivation of the Definition

In this section, we provide a derivation of definition in the main paper. **Definition 4.1(3-order T-product)** For  $\mathcal{A} \in \mathbb{R}^{n_1 \times n_2 \times n_3}$  and  $\mathcal{B} \in \mathbb{R}^{n_2 \times l \times n_3}$ , the 3-order T-product  $\mathcal{C} \in \mathbb{R}^{n_1 \times l \times n_3} = \mathcal{A} * \mathcal{B}$  is defined as:

$$\mathcal{C} = \mathcal{A} * \mathcal{B} = \text{fold}(\text{circ}(\mathcal{A}) \cdot \text{unfold}(\mathcal{B})), \quad (\text{S-1})$$

where “ $\cdot$ ” represents standard matrix product.

**Definition 4.2(Higher-order T-product)** For  $\mathcal{A} \in \mathbb{R}^{n_1 \times n_2 \times n_3 \cdots \times n_p}$  and  $\mathcal{B} \in \mathbb{R}^{n_2 \times l \times n_3 \times \cdots \times n_p}$ , the High-order T-product  $\mathcal{C} \in \mathbb{R}^{n_1 \times l \times n_3 \cdots \times n_p} = \mathcal{A} * \mathcal{B}$  is defined as:

$$\mathcal{C} = \mathcal{A} * \mathcal{B} = \text{fold}(\text{circ}(\mathcal{A}) * \text{unfold}(\mathcal{B})). \quad (\text{S-2})$$

*Derivation.* According to [3], if  $\mathcal{A}$  is  $n_1 \times n_2 \times n_3$ ,  $\mathcal{A}$  can be block diagonalized by using Discrete Fourier Transformer (DFT) matrix  $\mathbf{F}_{n_3} \in \mathbb{R}^{n_3 \times n_3}$  as:

$$(\mathbf{F}_{n_3} \otimes \mathbf{I}_{n_1}) \cdot \text{circ}(\text{unfold}(\mathcal{A})) \cdot (\mathbf{F}_{n_3}^* \otimes \mathbf{I}_{n_2}) = \mathbf{D} = \begin{bmatrix} \mathbf{D}_1 & & \\ & \ddots & \\ & & \mathbf{D}_{n_3} \end{bmatrix} \in \mathbb{R}^{n_1 n_3 \times n_2 n_3}, \quad (\text{S-3})$$

where “ $\otimes$ ” denotes the Kronecker product, “ $\mathbf{F}_{n_3}^*$ ” denotes the conjugate transpose of  $\mathbf{F}_{n_3}$ , “ $\cdot$ ” means standard matrix product and  $\mathbf{D}$  is a block diagonal matrix. In fact, the  $i$ -th block matrix  $\mathbf{D}_i$  of  $\mathbf{D}$  can be computed by applying DFT of  $\mathcal{A}$  along 3-rd dimension. The **3-order T-product** in Eq. (S-1) can be computed as:

$$(\mathbf{F}_{n_3}^* \otimes \mathbf{I}_{n_1}) \cdot ((\mathbf{F}_{n_3} \otimes \mathbf{I}_{n_1}) \cdot \text{circ}(\text{unfold}(\mathcal{A})) \cdot (\mathbf{F}_{n_3}^* \otimes \mathbf{I}_{n_2})) \cdot (\mathbf{F}_{n_3} \otimes \mathbf{I}_{n_2}) \cdot \text{unfold}(\mathcal{B}). \quad (\text{S-4})$$

It is readily shown that  $(\mathbf{F}_{n_3} \otimes \mathbf{I}_{n_2}) \text{unfold}$  can be computed by applying DFT of  $\mathcal{B}$  along 3-rd dimension: the result called  $\bar{\mathcal{B}}$ . Thus, Eq. (S-4) remains to multiply each block matrix  $\mathbf{D}_i$  of  $\mathbf{D}$  with each block matrix  $\mathbf{B}_i$  of  $\bar{\mathcal{B}}$ , then take an inverse DFT along the 3-rd dimension of the result. Hence, the **3-order T-product** in Eq. (S-1) can be re-formulated as:

$$\mathcal{C} = \text{DFT}_3^{-1}(\text{DFT}_3(\mathcal{A}) \odot \text{DFT}_3(\mathcal{B})) = \text{DFT}_3^{-1}(\bar{\mathcal{A}} \odot \bar{\mathcal{B}}) = \text{DFT}_3^{-1}(\bar{\mathcal{C}}), \quad (\text{S-5})$$

where  $\text{DFT}_3(\cdot)$  is DFT along 3-rd dimension and  $\text{DFT}_3^{-1}(\cdot)$  is the inverse DFT along 3-rd dimension. In mathematics, the DFT of  $\mathcal{A}$  along 3-rd dimension is formulated as:

$$\bar{\mathcal{A}} = \text{DFT}_3(\mathcal{A}) = \mathcal{A} \times_3 \mathbf{F}_{n_3}. \quad (\text{S-6})$$

Similarly, the inverse DFT of  $\bar{\mathcal{A}}$  along 3-rd dimension is derived as:

$$\mathcal{A} = \text{DFT}_3^{-1}(\bar{\mathcal{A}}) = \bar{\mathcal{A}} \times_3 \mathbf{F}_{n_3}^{-1}. \quad (\text{S-7})$$

By the detailed theoretical analysis in [4], the DFT has been extended to a general invertible transform  $S$  with an invertible transform matrix  $\mathbf{S}$ . In mathematics, the invertible transform of  $\mathcal{A}$  along 3-rd dimension is formulated as:

$$\bar{\mathcal{A}} = \mathbf{S}_3(\mathcal{A}) = \mathcal{A} \times_3 \mathbf{S}_{n_3}. \quad (\text{S-8})$$

Similarly, the inverse transform of  $\bar{\mathcal{A}}$  along 3-rd dimension is derived as:

$$\mathcal{A} = \mathbf{S}_3^{-1}(\bar{\mathcal{A}}) = \bar{\mathcal{A}} \times_3 \mathbf{S}_{n_3}^{-1}. \quad (\text{S-9})$$

Similarly, if  $\mathcal{A} \in \mathbb{R}^{n_1 \times n_2 \times \dots \times n_p}$ ,  $\mathcal{A}$  can be block diagonalized by using a sequence of DFT matrices  $\mathbf{F}_{n_i} \in \mathbb{R}^{n_i \times n_i}$ ,  $i = 3, 4, \dots, p$  as:

$$(\mathbf{F}_{n_p} \otimes \mathbf{F}_{n_{p-1}} \otimes \dots \otimes \mathbf{F}_{n_3} \otimes \mathbf{I}_{n_1}) \cdot \tilde{\mathcal{A}} \cdot (\mathbf{F}_{n_p}^* \otimes \mathbf{F}_{n_{p-1}}^* \otimes \dots \otimes \mathbf{F}_{n_3}^* \otimes \mathbf{I}_{n_2}) = \mathbf{D}, \quad (\text{S-10})$$

where  $\tilde{\mathcal{A}} = \text{circ}(\text{unfold}(\mathcal{A})) \in \mathbb{R}^{n_1 n_3 n_4 \dots n_p \times n_2 n_3 \dots n_p}$ . Since the matrix  $\mathbf{D}$  is block diagonal with  $n_3 n_4 \dots n_p$  blocks each of size  $n_1 \times n_2$ , the **Higher-order T-product** in Eq. (S-2) can be computed as:

$$(\tilde{\mathbf{F}}^* \otimes \mathbf{I}_{n_1}) \cdot ((\tilde{\mathbf{F}} \otimes \mathbf{I}_{n_1}) \cdot \tilde{\mathcal{A}} \cdot (\tilde{\mathbf{F}}^* \otimes \mathbf{I}_{n_2})) \cdot (\tilde{\mathbf{F}}_{n_3} \otimes \mathbf{I}_{n_2}) \cdot \tilde{\mathcal{B}}, \quad (\text{S-11})$$

where  $\tilde{\mathbf{F}} = \mathbf{F}_{n_p} \otimes \mathbf{F}_{n_{p-1}} \otimes \dots \otimes \mathbf{F}_{n_3}$ . Using the DEF, it is straightforward to show that the block diagonal matrix  $\mathbf{D}$  in Eq. (S-10) can be obtained by repeated DFTs of  $\mathcal{A}$  along each dimension except for 1-st and 2-nd dimension. Similarly, by using a sequence invertible transform  $S_j(\cdot)$ ,  $i = 3, 4, \dots, p$  with invertible transform matrix  $\mathbf{S}_i$ , the **Higher-order T-product** in Eq. (S-2) can be re-formulated as:

$$\mathcal{C} = \tilde{S}^{-1}(\tilde{S}(\mathcal{A}) \odot \tilde{S}(\mathcal{B})) = \tilde{S}^{-1}(\bar{\mathcal{A}} \odot \bar{\mathcal{B}}) = \tilde{S}^{-1}(\bar{\mathcal{C}}), \quad (\text{S-12})$$

where  $\tilde{S}(\mathcal{A}) = S_p(S_{p-1}(\dots S_3(\mathcal{A}) \dots))$ ,  $\bar{\mathcal{C}} = \bar{\mathcal{A}} \odot \bar{\mathcal{B}}$  denotes the frontal-slice-wise product  $\bar{\mathcal{C}}(:, :, i) = \bar{\mathcal{A}}(:, :, i) \cdot \bar{\mathcal{B}}(:, :, i)$ ,  $i = 1, 2, \dots, n_3 n_4 \dots n_p$  and  $\tilde{S}^{-1}(\cdot)$  is the inverse transform of  $\tilde{S}(\cdot)$ . The inverse transform  $\tilde{S}(\cdot)$  is formulated as:

$$\bar{\mathcal{A}} = \tilde{S}(\mathcal{A}) = \mathcal{A} \times_3 \mathbf{S}_3 \times_4 \mathbf{S}_4 \dots \times_p \mathbf{S}_p, \quad (\text{S-13})$$

and its inverse transform is derived as:

$$\mathcal{A} = \tilde{S}^{-1}(\bar{\mathcal{A}}) = \bar{\mathcal{A}} \times_3 \mathbf{S}_3^{-1} \times_4 \mathbf{S}_4^{-1} \dots \times_p \mathbf{S}_p^{-1}. \quad (\text{S-14})$$

■

## B. Extension Visualization

We present more visualization to illustrate how the misalignment problem impacts segmentation performance, as shown in Figs. S-1 and S-2. These results validate the effectiveness of alignment. In addition, we visualize the training accuracy curve in Fig. S-3, further demonstrating the advantage of the symmetric fine-tuning solution.

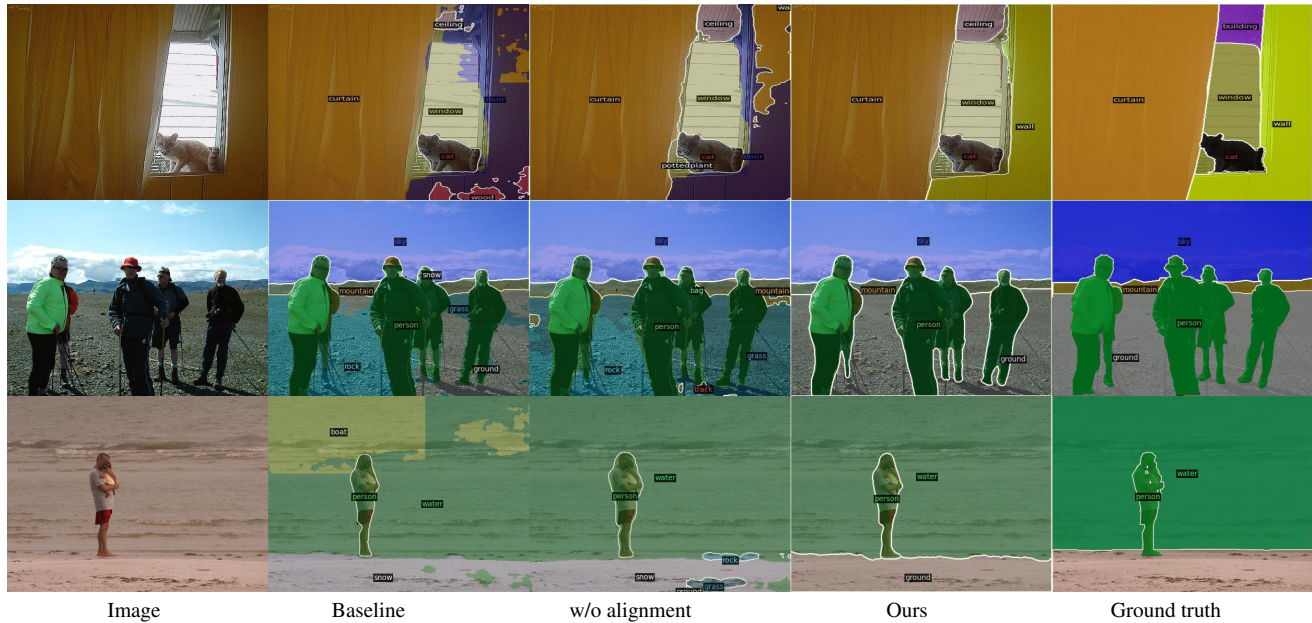

Figure S-1. Comparison of qualitative results on VOC2010 with 59 categories.

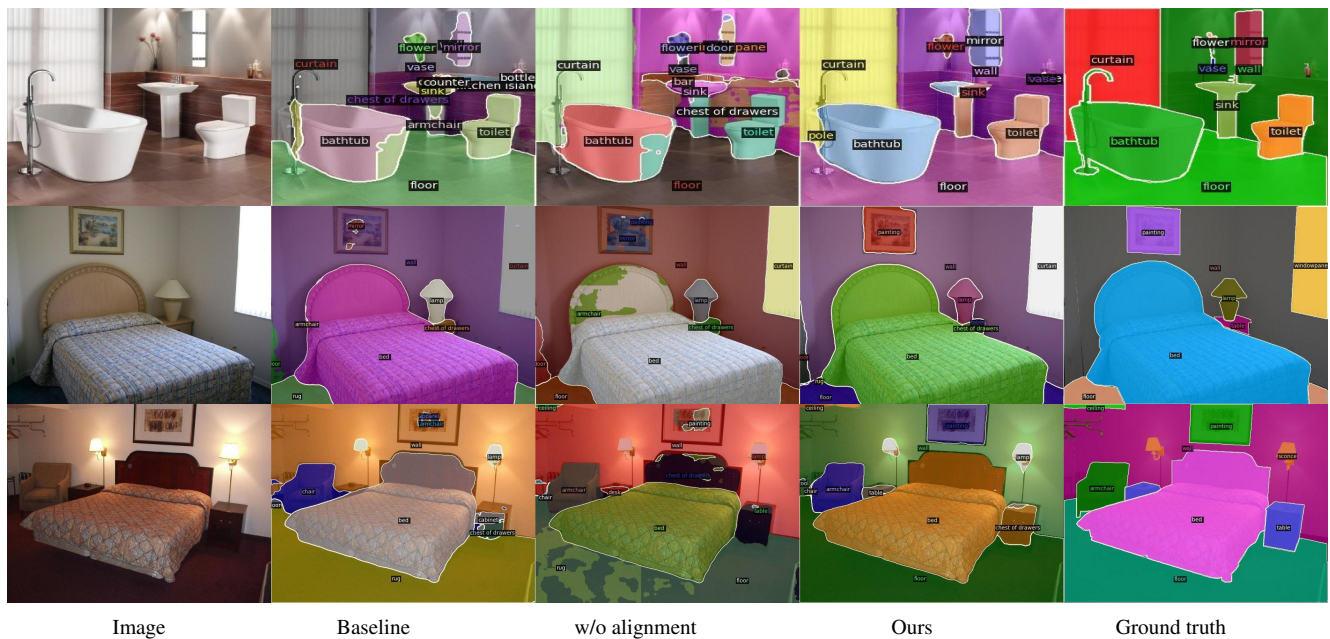

Figure S-2. Comparison of qualitative results on ADE20K with 150 categories.

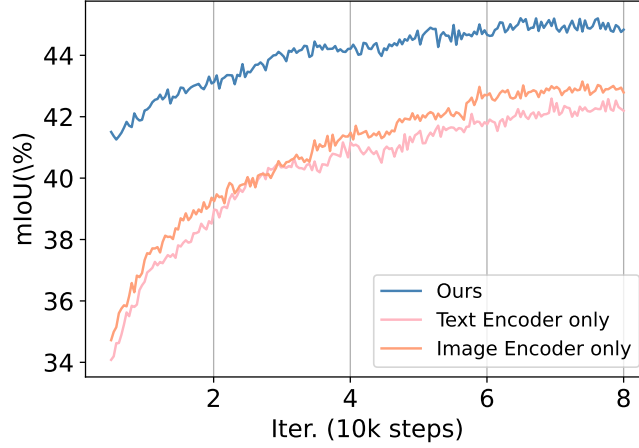

Figure S-3. Training accuracy curves. The comparison is conducted between symmetric fine-tuning (Ours) and asymmetric fine-tuning (text encoder only or image encoder only).

## C. Dataset Descriptions

Here, we present detailed descriptions of three datasets we used in open-vocabulary semantic segmentation.

- **ADE20K** [6] is a classical semantic segmentation dataset comprising around 20,000 training images and 2,000 validation images. Besides, it includes two different test sets: A-150 and A-847. The test set A-150 has 150 common categories, while the test set A-847 has 847 categories.
- **PASCAL VOC** [2] is a small dataset for semantic segmentation, which includes 1464 training images and 1449 validation images. The dataset contains 20 different foreground categories. We name it as PAS-20. In line with [1], we also report a score on PAS-20<sup>b</sup>, which involves “background” as the 21st category.
- **PASCAL-Context** [5] is upgraded from the original PASCAL VOC dataset. It includes two different test sets: PC-59 and PC-459 for evaluation. The test set PC-59 has 59 categories, while the test set PC-459 has 459 categories.

## References

- [1] Seokju Cho, Heeseong Shin, Sunghwan Hong, Anurag Arnab, Paul Hongsuck Seo, and Seungryong Kim. Cat-seg: Cost aggregation for open-vocabulary semantic segmentation, 2024. 4
- [2] Mark Everingham, Luc Van Gool, Christopher KI Williams, John Winn, and Andrew Zisserman. The pascal visual object classes (voc) challenge. *International journal of computer vision*, 88:303–338, 2010. 4
- [3] Misha E Kilmer and Carla D Martin. Factorization strategies for third-order tensors. *Linear Algebra and its Applications*, 435(3): 641–658, 2011. 1
- [4] Canyi Lu, Xi Peng, and Yunchao Wei. Low-rank tensor completion with a new tensor nuclear norm induced by invertible linear transforms. In *Proceedings of the IEEE/CVF conference on computer vision and pattern recognition*, pages 5996–6004, 2019. 2
- [5] Roozbeh Mottaghi, Xianjie Chen, Xiaobai Liu, Nam-Gyu Cho, Seong-Whan Lee, Sanja Fidler, Raquel Urtasun, and Alan Yuille. The role of context for object detection and semantic segmentation in the wild. In *Proceedings of the IEEE conference on computer vision and pattern recognition*, pages 891–898, 2014. 4
- [6] Bolei Zhou, Hang Zhao, Xavier Puig, Tete Xiao, Sanja Fidler, Adela Barriuso, and Antonio Torralba. Semantic understanding of scenes through the ade20k dataset. *International Journal of Computer Vision*, 127:302–321, 2019. 4
